# Supplementary material for: Fluorinated trimethyllysine as a19F NMR probe for trimethyllysine hydroxylase catalysis
Source: Royal Society of Chemistry journal article supplement (doi:10.1039/c6ob02683d), 2017-01-01
Supplement: c6ob02683d1.pdf [file c6ob02683d1.pdf]

## **Supplementary Information**

### **Fluorinated trimethyllysine as a $^{19}\text{F}$ NMR probe for trimethyllysine hydroxylase catalysis**

Y. Vijayendar Reddy, Abbas H. K. Al Temimi and Jasmin Mecinović\*

Institute for Molecules and Materials, Radboud University, Heyendaalseweg 135,  
6525 AJ Nijmegen, The Netherlands.

E-mail: j.mecinovic@science.ru.nl

## **Contents**

1. TMLH Production
2. LC-MS Experiments
3. NMR Experiments
4. Supplementary Figures
5. Syntheses and Characterisations
6. NMR Spectra
7. References

## 1. TMLH Production

The expression and purification of human TMLH were done following the reported protocol.<sup>1</sup>

## 2. LC-MS Experiments

LC-MS enzymatic experiments were conducted at 310 K in phosphate buffer (20 mM) and KCl (20 mM) and DTT (2 mM) at pH 7.0. To a premixed solution of TMLH (3  $\mu$ M), FeSO<sub>4</sub> (500  $\mu$ M), 2OG (2.5 mM) and ascorbate (5 mM), was added *N*<sup>ε</sup>-trimethyllysine **1** or *N*<sup>ε</sup>-(fluoromethyl)dimethyllysine **3** (500  $\mu$ M). After shaking for 30 minutes at 37 °C in Eppendorf, the reaction mixutre (100  $\mu$ L) was quenched with methanol (100  $\mu$ L). Subsequently, the sample was analyzed by LC-MS and was performed on a Thermo Finnigan LCQ-Fleet ESI-ion trap (Thermofischer, Breda, the Netherlands) equipped with a Phenomenex Gemini-NX C18 column, 50 x 2.0 mm, particle size 3  $\mu$ M (Phenomenex, Utrecht, The Netherlands). An acetonitrile/water gradient containing 0.1 % formic acid was used for elution (5-100 %, 1-50 min, flow 0.2 mL min<sup>-1</sup>).

## 3. NMR Experiments

NMR enzymatic experiments were conducted at 310 K in 20 mM Tris-D<sub>11</sub>.HCl (pD 7.5). To a premixed solution of TMLH (3  $\mu$ M), FeSO<sub>4</sub> (100  $\mu$ M), 2OG (2 mM) and ascorbate (500  $\mu$ M), was added *N*<sup>ε</sup>-trimethyllysine **1** or *N*<sup>ε</sup>-(fluoromethyl)dimethyllysine **3** (500  $\mu$ M). After shaking for 1 hour at 37 °C in Eppendorf, the reaction mixutre (500  $\mu$ L) was transferred into the NMR tube and recorded by <sup>1</sup>H NMR at 298 K. NMR spectra were recorded on a Bruker Avance III spectrometer paired with a 500 MHz magnet equipped with the Prodigy cryoprobe. <sup>1</sup>H 1D spectra were acquired using presaturation to suppress the water signal with 64 or 128 transients and a relaxation delay of 4 s. 2D COSY spectra were acquired with presaturation of the water resonance using 2k points per transient, 16 transients per increment with a relaxation delay of 2 s and 256 increments with a sweep width of 10 ppm in each dimension. 2D TOCSY spectra were acquired with presaturation of the water resonance using 1k points per transient, 16 transients per increment with a relaxation delay of 2 s and 256 increments with a sweep width of 10 ppm in each dimension. 2D <sup>1</sup>H-<sup>13</sup>C multiplicity-edited HSQC spectra were acquired using 1k points per transient, 16 transients per increment, a relaxation delay of 2 s, and 256

increments. The  $^{13}\text{C}$  sweep width spanned from -10 ppm to 130 ppm.  $^1\text{H}$  NMR characterization of substrates prior to enzymatic catalysis was performed using a  $30^\circ$  excitation pulse, 16-128 transients per compound, and a relaxation delay of 8 s.  $^{13}\text{C}$ - $^1\text{H}$  spectra of the substrates were recorded using a  $30^\circ$  excitation pulse, 512-4096 transients per compound and a relaxation delay of 2 s.

#### 4. Supplementary Figures

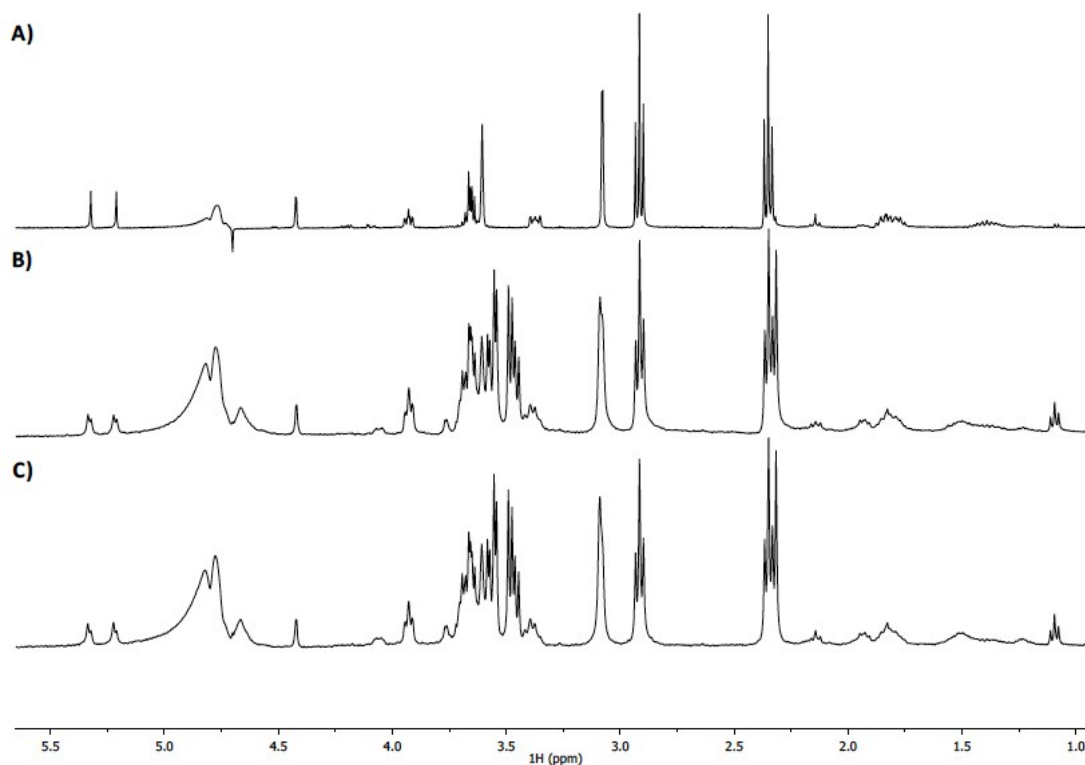

**Fig. S1** <sup>1</sup>H NMR analyses of the time-course experiment of TMLH-catalysed hydroxylation of *N*<sup>ε</sup>-(fluoromethyl)dimethyllysine (**3**). A) <sup>1</sup>H NMR spectrum of the control experiment (i.e. in the absence of TMLH). B) <sup>1</sup>H NMR spectrum of TMLH-catalysed hydroxylation of *N*<sup>ε</sup>-(fluoromethyl)dimethyllysine (**3**) after 1 h incubation at 37 °C. C) <sup>1</sup>H NMR spectrum of TMLH-catalysed hydroxylation of *N*<sup>ε</sup>-(fluoromethyl)dimethyllysine (**3**) after 2 h incubation at 37 °C.

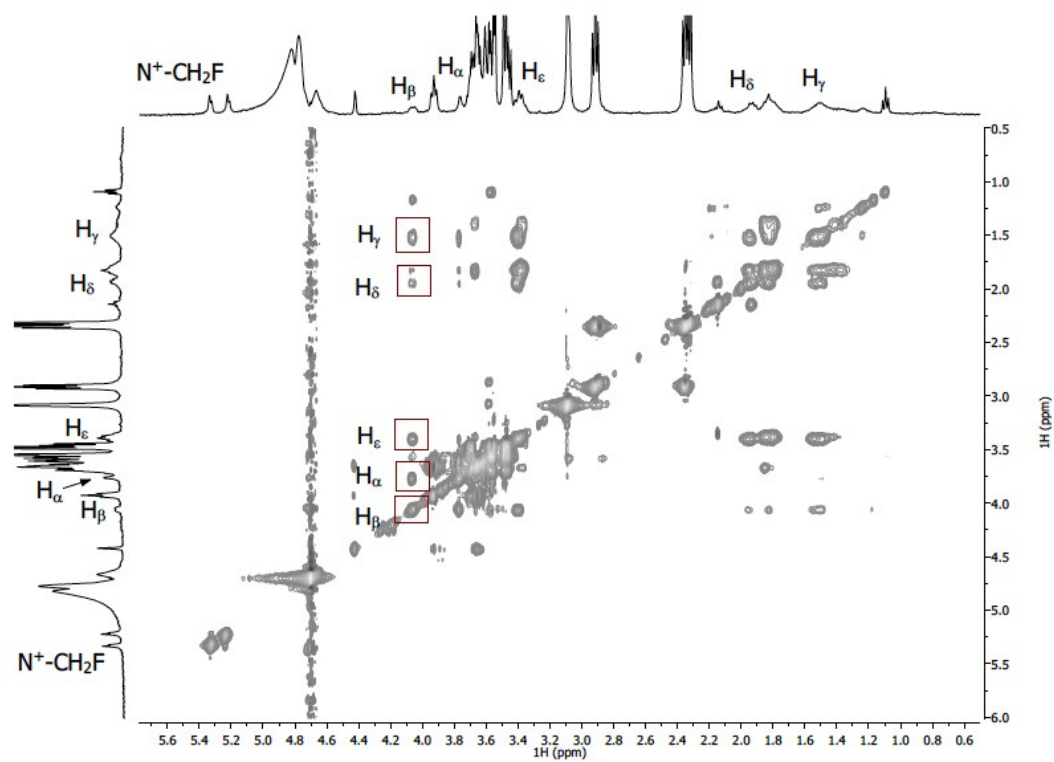

**Fig. S2** Full TOCSY data of TMLH-catalysed C-3 hydroxylation of *N* $\epsilon$ -(fluoromethyl)dimethyllysine (**3**).

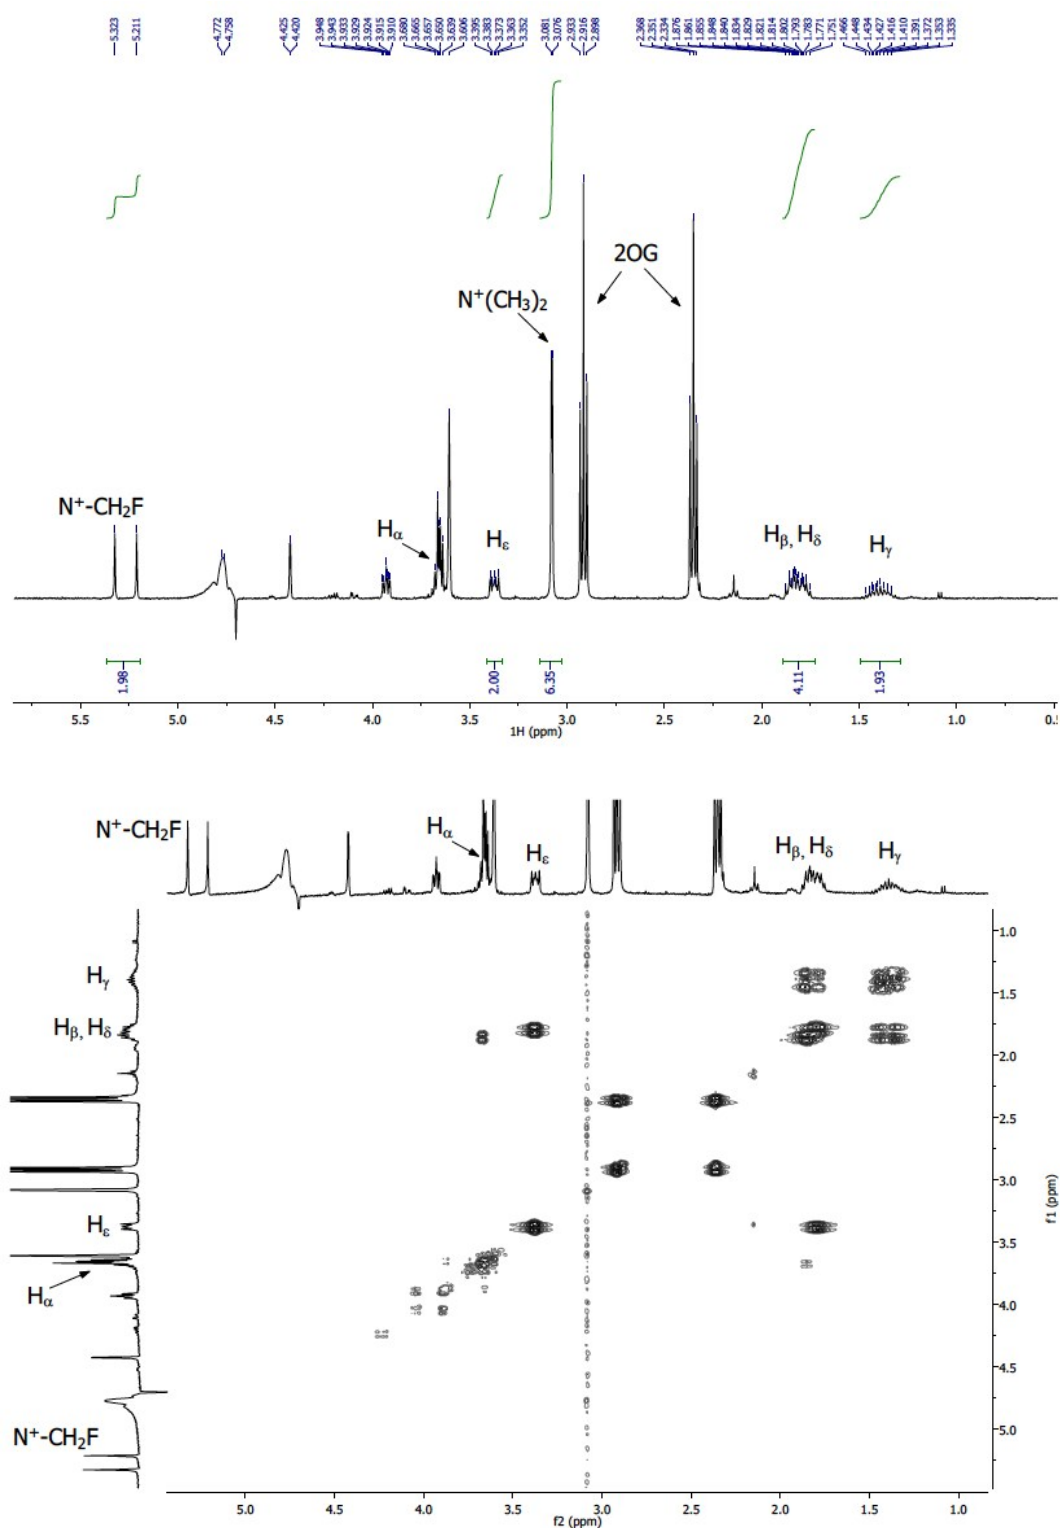

**Fig. S3** NMR analyses of the control experiment of *N*<sup>ε</sup>-(fluoromethyl)dimethyllysine (**3**) (in the absence of TMLH). <sup>1</sup>H NMR data of the control experiment of *N*<sup>ε</sup>-(fluoromethyl)dimethyllysine (**3**) (top). <sup>1</sup>H-<sup>1</sup>H COSY data of the control experiment of *N*<sup>ε</sup>-(fluoromethyl)dimethyllysine (**3**) (bottom).

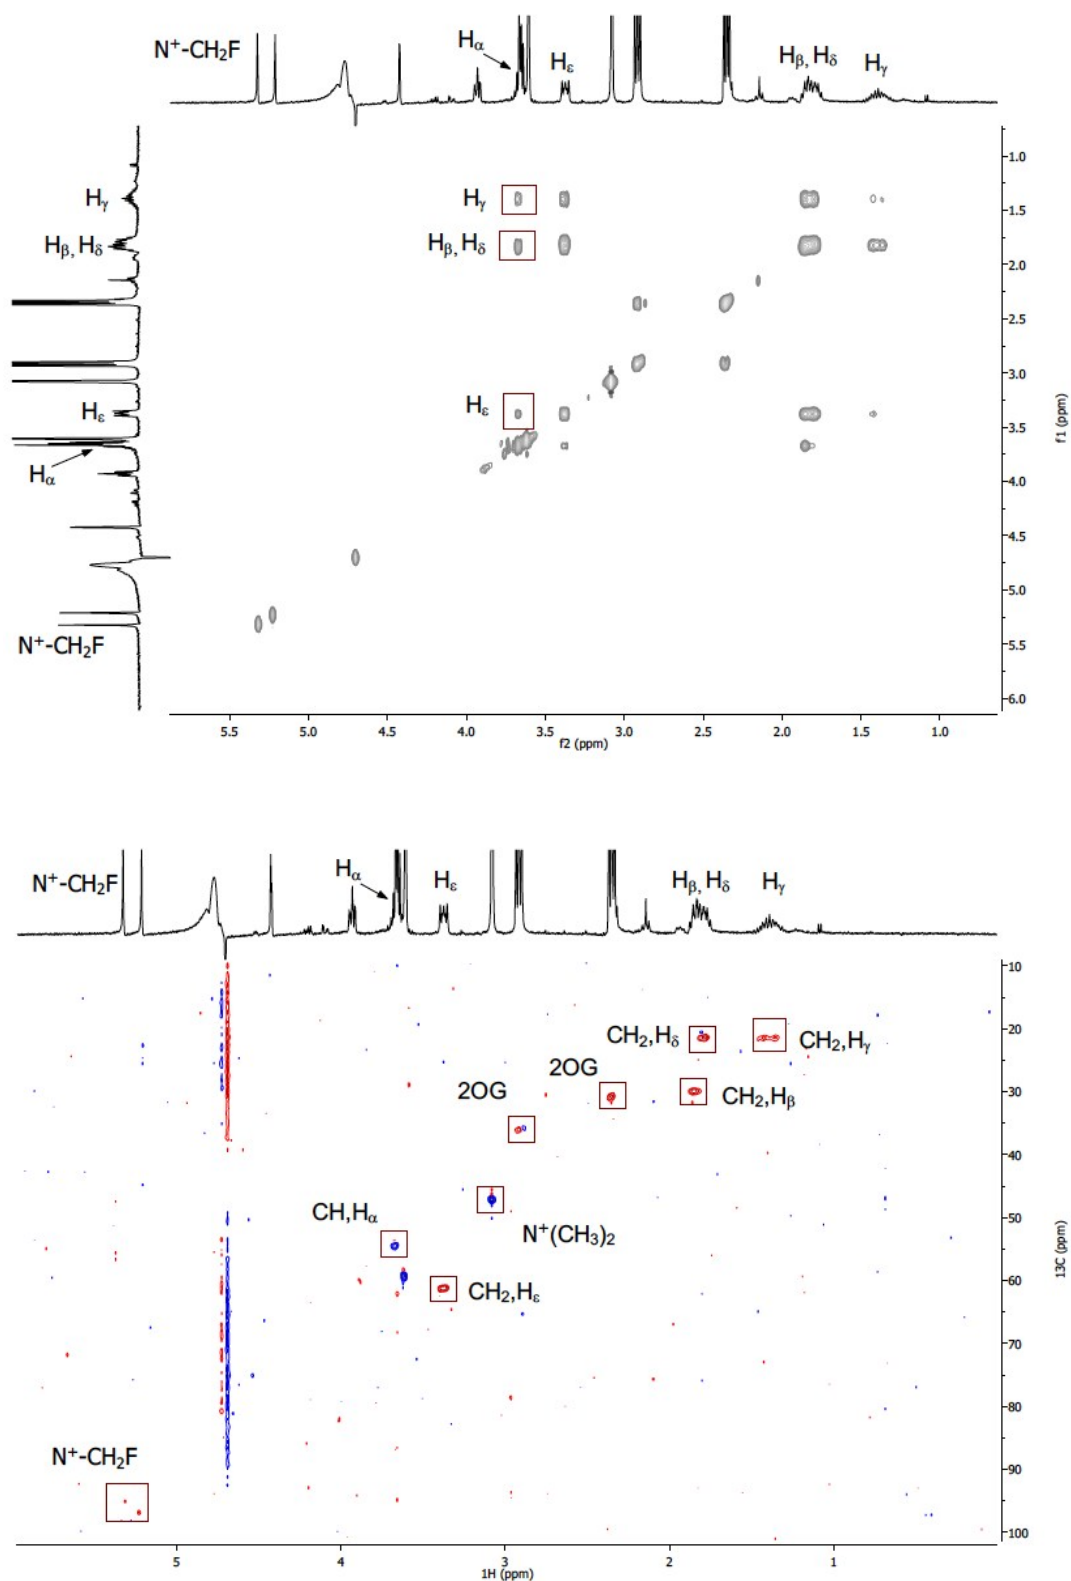

**Fig. S4** NMR analyses of the control experiment of *N* $\epsilon$ -(fluoromethyl)dimethyllysine (**3**) (in the absence of TMLH). TOCSY data of the control experiment of *N* $\epsilon$ -(fluoromethyl)dimethyllysine (**3**) (top). Multiplicity-edited HSQC data of the control experiment of *N* $\epsilon$ -(fluoromethyl)dimethyllysine (**3**) (bottom; blue = positive, CH/CH $_3$ , red = negative, CH $_2$ ).

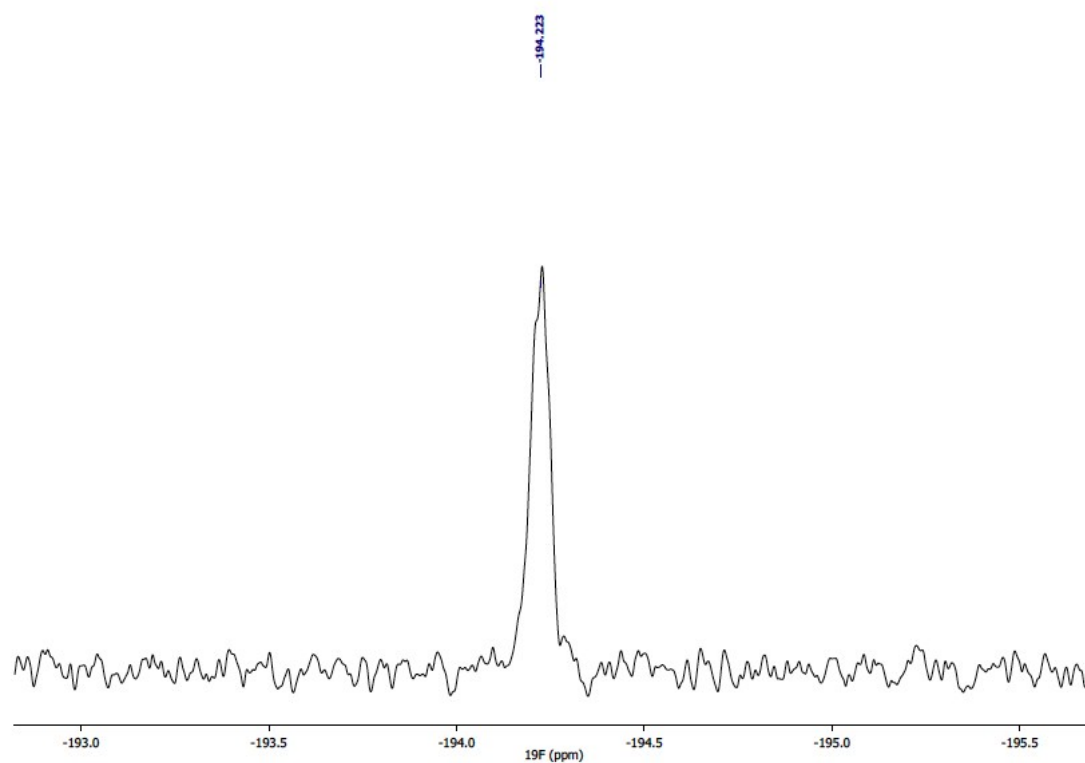

**Fig. S5**  $^{19}\text{F}$  NMR data of TMLH-catalysed C-3 hydroxylation of *N*<sup>ε</sup>-(fluoromethyl)dimethyllysine (**3**). Reaction conditions: Reaction performed under standard conditions with TMLH (3  $\mu\text{M}$ ) for 1 h at 37  $^{\circ}\text{C}$ , and then additional TMLH was added (6  $\mu\text{M}$  final concentration). The enzymatic mixture was then incubated for another 1 h at 37  $^{\circ}\text{C}$  and the  $^{19}\text{F}$  NMR spectrum was recorded.

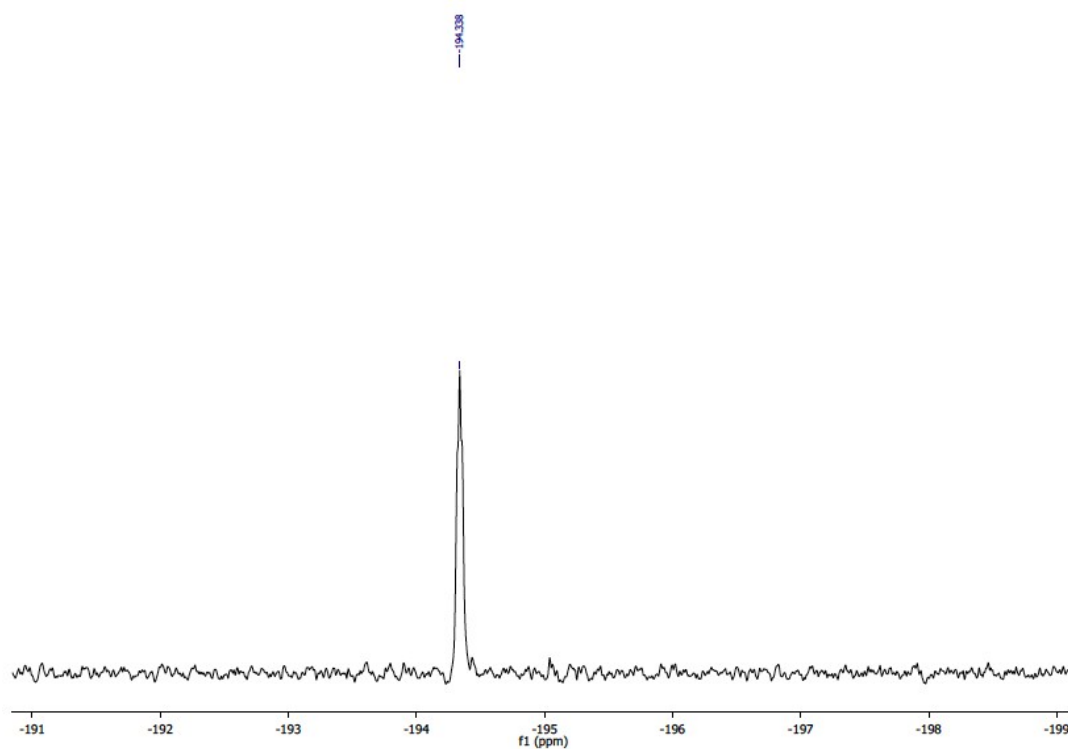

**Fig. S6**  $^{19}\text{F}$  NMR data of the control experiment of *N* $^{\epsilon}$ -(fluoromethyl)dimethyllysine (**3**) in the presence of  $\text{FeSO}_4$ , 2OG and ascorbate (but in the absence of TMLH) after incubation at 37 °C for 1 h.

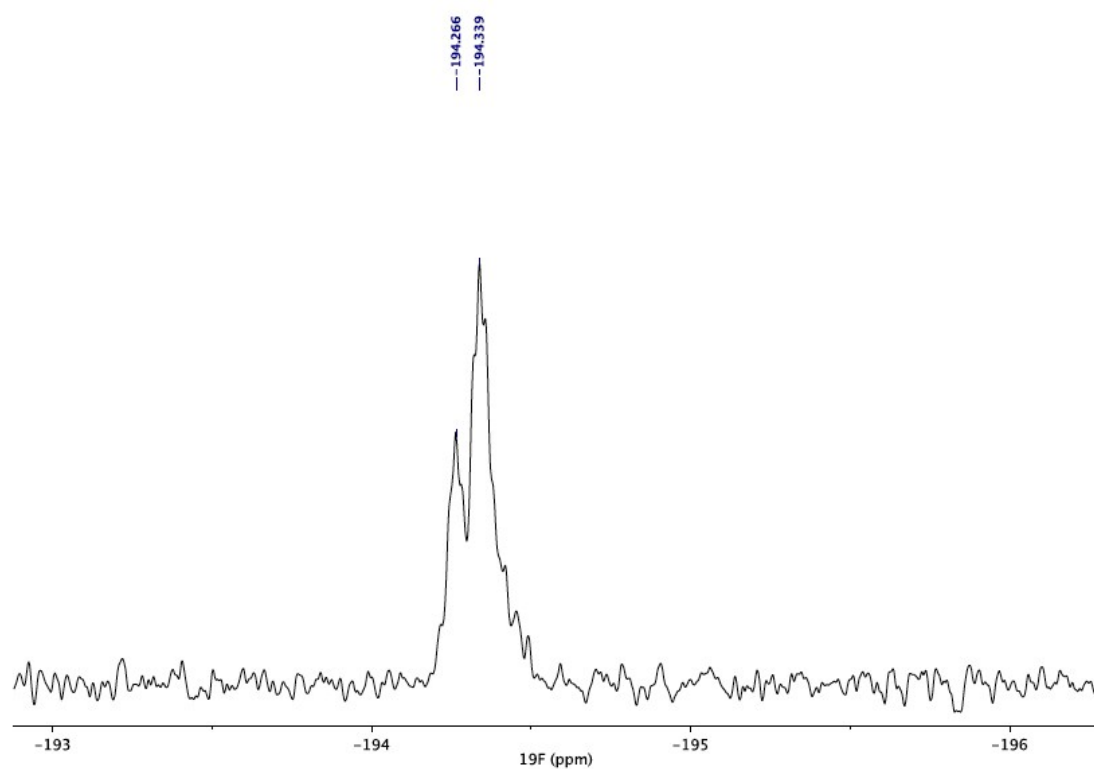

**Fig. S7**  $^{19}\text{F}$  NMR analysis of the mixture of *N*<sup>ε</sup>-(fluoromethyl)dimethyllysine (**3**),  $\text{FeSO}_4$ , 2OG, ascorbate and cell lysates that contain TMLH after incubation at 37 °C for 2 h.

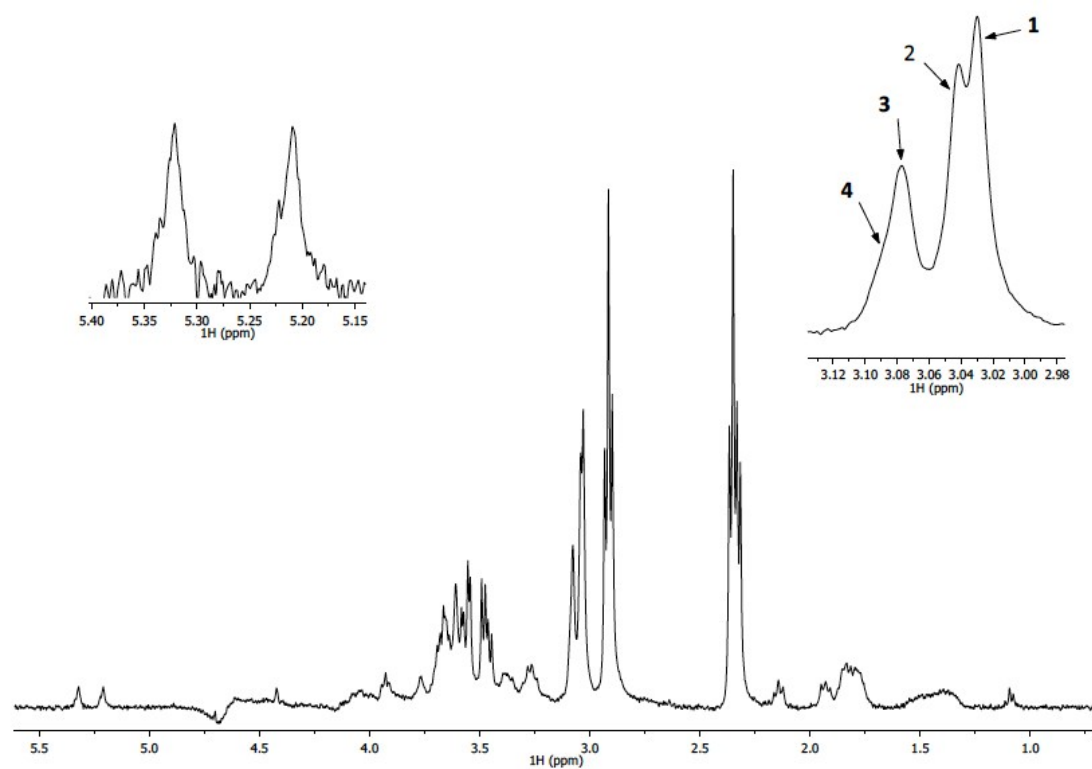

**Fig. S8**  $^1\text{H}$  NMR analysis of TMLH-catalysed hydroxylation of 1:1 mixture of  $N^\epsilon$ -(fluoromethyl)dimethyllysine (**3**) and  $N^\epsilon$ -trimethyllysine (**1**) after 1 h incubation at 37 °C. Zoomed views are also shown.

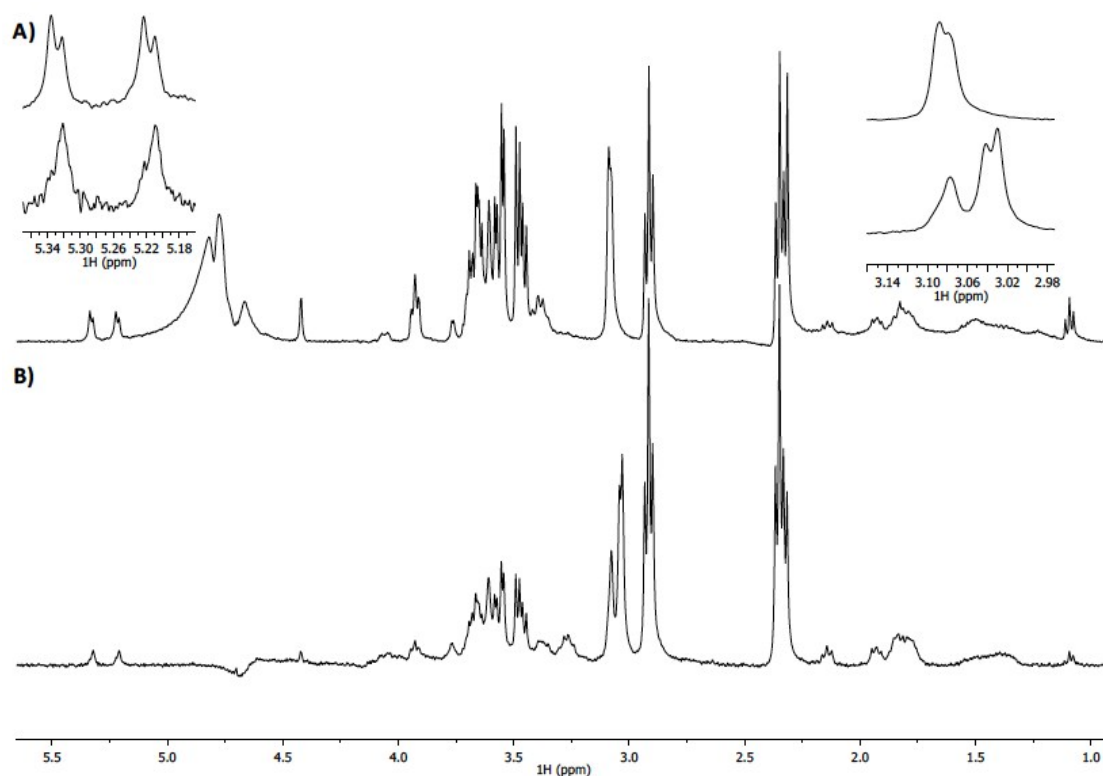

**Fig. S9** Comparative  $^1\text{H}$  NMR analyses of TMLH-catalysed hydroxylation of  $N^\epsilon$ -(fluoromethyl)dimethyllysine (**3**). A)  $^1\text{H}$  NMR spectrum of TMLH-catalysed hydroxylation of  $N^\epsilon$ -(fluoromethyl)dimethyllysine (**3**) for 1 h incubation at 37 °C (top). B)  $^1\text{H}$  NMR spectrum of TMLH-catalysed hydroxylation of 1:1 mixture of  $N^\epsilon$ -(fluoromethyl)dimethyllysine (**3**) and  $N^\epsilon$ -trimethyllysine (**1**) after 1 h incubation at 37 °C (bottom).

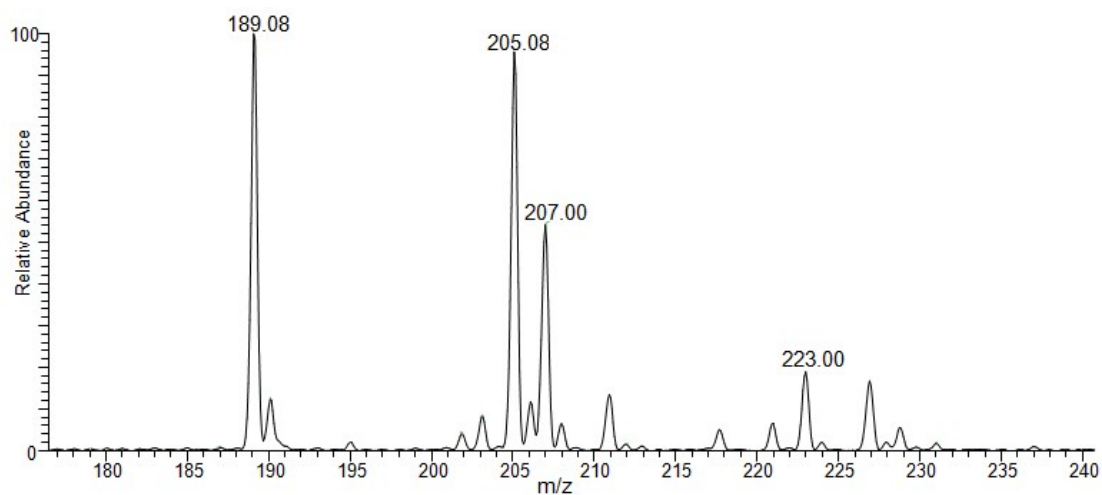

**Fig. S10** LC-MS analysis of the competition experiment between *N*<sup>ε</sup>-trimethyllysine (**1**) (500 μM) and *N*<sup>ε</sup>-(fluoromethyl)dimethyllysine (**3**) (500 μM) in the presence of TMLH (3 μM), FeSO<sub>4</sub>, 2OG and ascorbate after 1 hour at 37 °C. (**1** = 189.08 Da, **2** = 205.08 Da, **3** = 207.00 Da, **4** = 223.00 Da)

## 5. Syntheses and Characterisations

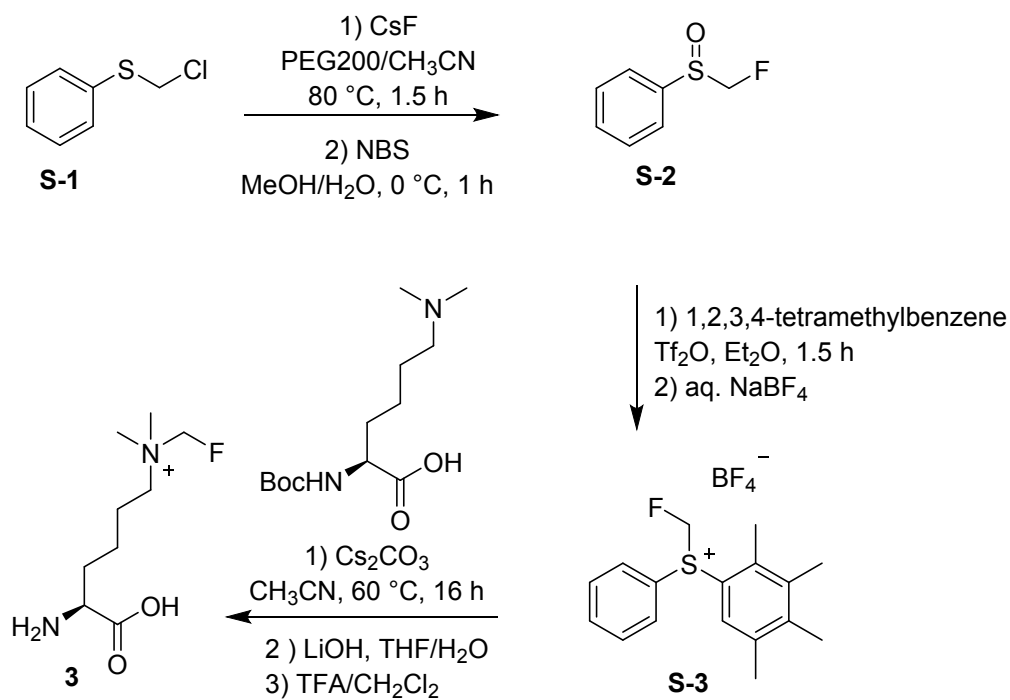

**Scheme S1:** Synthesis of *N*<sup>ε</sup>-(fluoromethyl)dimethyllysine (**3**)<sup>2</sup>

### ((Fluoromethyl)sulfinyl)benzene (S-2)<sup>2</sup>

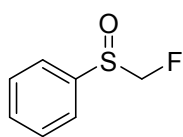

To a stirred suspension of chloromethyl phenyl sulphide (2.7 mL, 20.0 mmol) in PEG200/CH<sub>3</sub>CN (20 mL, 1:2 v/v) was added CsF (6.1 g, 40.0 mmol) and heated to 80 °C for 1.5 h until the disappearance of the chloride as monitored by LCQ-MS analysis. The reaction mixture was then cooled to room temperature and partitioned between water and CH<sub>2</sub>Cl<sub>2</sub>. The aqueous layer was then extracted with CH<sub>2</sub>Cl<sub>2</sub>. The combined organic phases were dried over Na<sub>2</sub>SO<sub>4</sub> and concentrated under reduced pressure. Then the crude yellow oil was dissolved in a mixture of MeOH (30 mL) and water (3 mL) and cooled to 0 °C in an ice-water bath. To the stirring solution *N*-Bromosuccinimide (7.3 g, 41.0 mmol) was added slowly to maintain the internal temperature below 10 °C, and stirring continued for 1 h at 0 °C. The mixture was diluted with CH<sub>2</sub>Cl<sub>2</sub> (100 mL) and washed with 10% Na<sub>2</sub>S<sub>2</sub>O<sub>3</sub>, 5% H<sub>2</sub>SO<sub>4</sub>, satd. NaHCO<sub>3</sub> and brine. The organic phase was dried over Na<sub>2</sub>SO<sub>4</sub> and concentrated under reduced pressure. The crude compound was purified by flash column chromatography to furnish the compound (1.65 g, 52%): <sup>1</sup>H NMR (500 MHz, CDCl<sub>3</sub>) δ 7.66 (dd, *J* = 6.7, 3.0 Hz, 2H), 7.58 – 7.49 (m, 3H), 5.10 (d, *J* = 47.7 Hz, 2H). <sup>13</sup>C NMR (125 MHz, CDCl<sub>3</sub>) δ 138.2 (d, *J* = 6.4 Hz), 132.2, 129.6, 124.8, 98.0 (d, *J* = 221.1 Hz); <sup>19</sup>F NMR (471 MHz, CDCl<sub>3</sub>) δ -212.27 (t, *J* = 47.7 Hz). MS: calcd for C<sub>7</sub>H<sub>8</sub>FOS<sup>+</sup> 159.0, found 159.0. The spectroscopic data were consistent with literature values.<sup>2</sup>

### ((Fluoromethyl)(phenyl)(2,3,4,5-tetramethylphenyl)sulfonium tetrafluoroborate (S-3)<sup>2</sup>

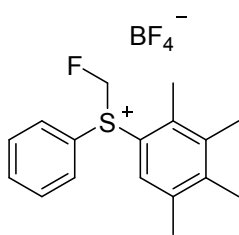

To a stirred solution of fluoromethylsulphenyl benzene (1.26 g, 8.0 mmol) and 1,2,3,4-tetramethylbenzene (1.20 mL, 8.0 mmol) in dry Et<sub>2</sub>O (15 mL) was added triflic anhydride (1.35 mL, 8.0 mmol) slowly for 30 min at 0 °C. After stirring for 1 h, the precipitated solid was filtered, washed with ice cold Et<sub>2</sub>O three times, dissolved in 60 mL DCM and washed with an aqueous NaBF<sub>4</sub> solution (1M). The organic phase was dried over Na<sub>2</sub>SO<sub>4</sub> and concentrated under reduced pressure and concentrated under reduced pressure to furnish the compound (1.36 g, 47%) as an off-white solid: <sup>1</sup>H NMR (500 MHz, CDCl<sub>3</sub>) δ 7.84 – 7.79 (m, 2H), 7.76 (t, *J* = 7.4 Hz, 1H), 7.69 (t, *J* = 7.7 Hz, 2H), 7.45 (s, 1H), 6.59 (dd, *J* = 37.7, 9.5 Hz, 1H), 6.49 (dd, *J* = 36.6, 9.5 Hz, 1H), 2.52 (s, 3H), 2.40 (s, 3H), 2.33 (s, 3H), 2.31 (s, 3H); <sup>13</sup>C

NMR (125 MHz, CDCl<sub>3</sub>)  $\delta$  143.9, 139.3, 138.3, 137.2, 134.6, 131.5, 130.8, 128.2, 128.1, 121.0, 115.9, 90.0, 88.1, 20.8, 17.5, 16.8, 16.8, 16.7; <sup>19</sup>F NMR (471 MHz, CDCl<sub>3</sub>)  $\delta$  -151.46, -151.52, -207.16 (t,  $J$  = 46.6 Hz). MS: calcd for C<sub>17</sub>H<sub>20</sub>FS<sup>+</sup> 275.1, found 275.0. The spectroscopic data were consistent with literature values.<sup>2</sup>

***N*<sup>ε</sup>-(Fluoromethyl)dimethyllysine (**3**)<sup>2</sup>**

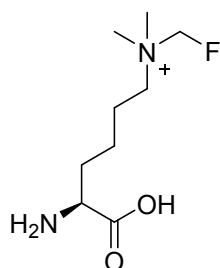

To a solution of *N*-Boc dimethyllysine (50 mg, 0.18 mmol) in CH<sub>3</sub>CN (10 mL) was added Cs<sub>2</sub>CO<sub>3</sub> (88 mg, 0.27 mmol) and the reaction mixture was stirred vigorously at room temperature, and then monofluoromethyl sulphonium salt **S-3** (196 mg, 0.54 mmol) was added in one portion. The resultant suspension was stirred at 60 °C overnight and filtered. The filtrate was extracted with cyclohexane for three times and co-evaporated with MeOH and CH<sub>2</sub>Cl<sub>2</sub>. The residue was dissolved in TFA/MeOH (1:1 v/v, 5 mL) and was added a solution of LiOH (20 mg) in water (5 mL). The reaction mixture was stirred at room temperature for 4 h, and then the volatiles were evaporated. The residue was suspended in MeOH, filtered and the filtrate was concentrated under reduced pressure. The resultant residue was re-dissolved in CH<sub>2</sub>Cl<sub>2</sub> (5 mL) and TFA (200  $\mu$ L) was added. The reaction mixture was stirred at room temperature for 2 h and then the volatiles were evaporated under reduced pressure, the crude was purified by reverse phase HPLC to furnish *N*<sup>ε</sup>-(fluoromethyl)dimethyllysine (**3**) as a TFA salt: <sup>1</sup>H NMR (500 MHz, D<sub>2</sub>O)  $\delta$  5.27 (d,  $J$  = 45.0 Hz, 2H), 3.76 (td,  $J$  = 6.2, 2.0 Hz, 1H), 3.47 – 3.30 (m, 2H), 3.08 (d,  $J$  = 2.0 Hz, 6H), 1.93 – 1.84 (m, 2H), 1.84 – 1.75 (m, 2H), 1.41 (dddd,  $J$  = 37.2, 13.6, 10.6, 6.3 Hz, 2H); <sup>13</sup>C NMR (125 MHz, D<sub>2</sub>O)  $\delta$  173.0, 96.0 (d,  $J$  = 220.7 Hz), 61.1, 53.4, 47.1, 29.4, 21.3, 21.2; <sup>19</sup>F NMR (471 MHz, D<sub>2</sub>O)  $\delta$  -194.27 (t,  $J$  = 45.2 Hz). The spectroscopic data were consistent with literature values.<sup>2</sup>

## 6. NMR Spectra

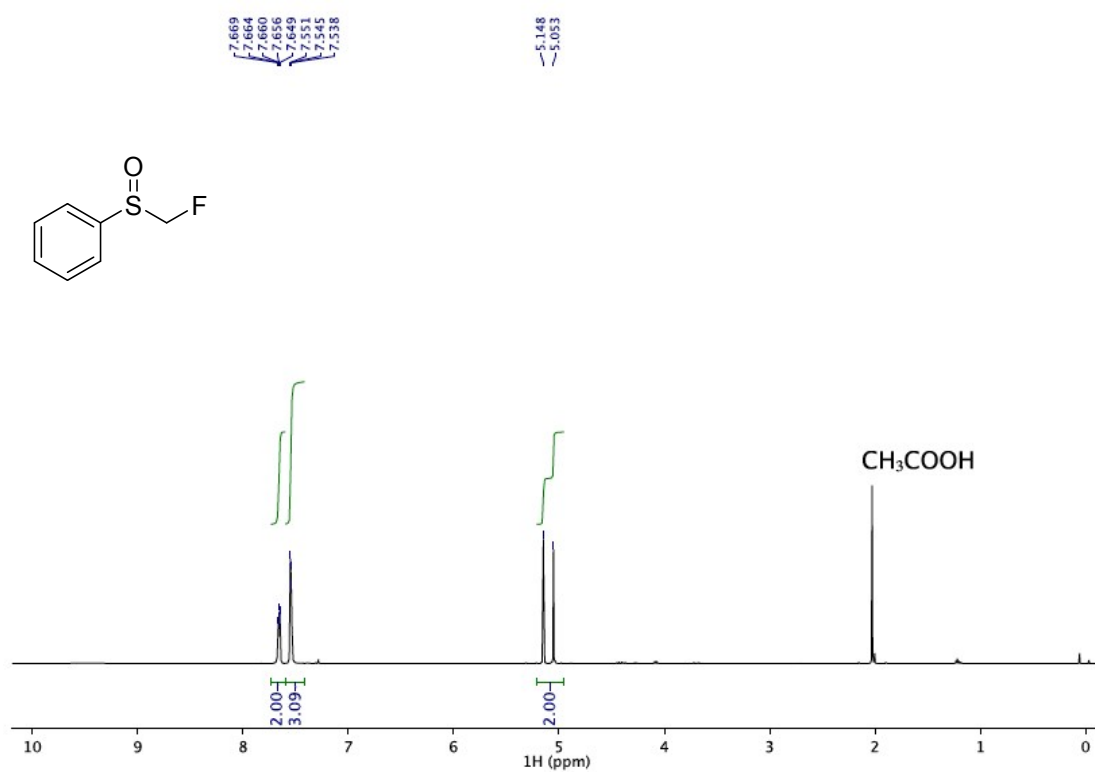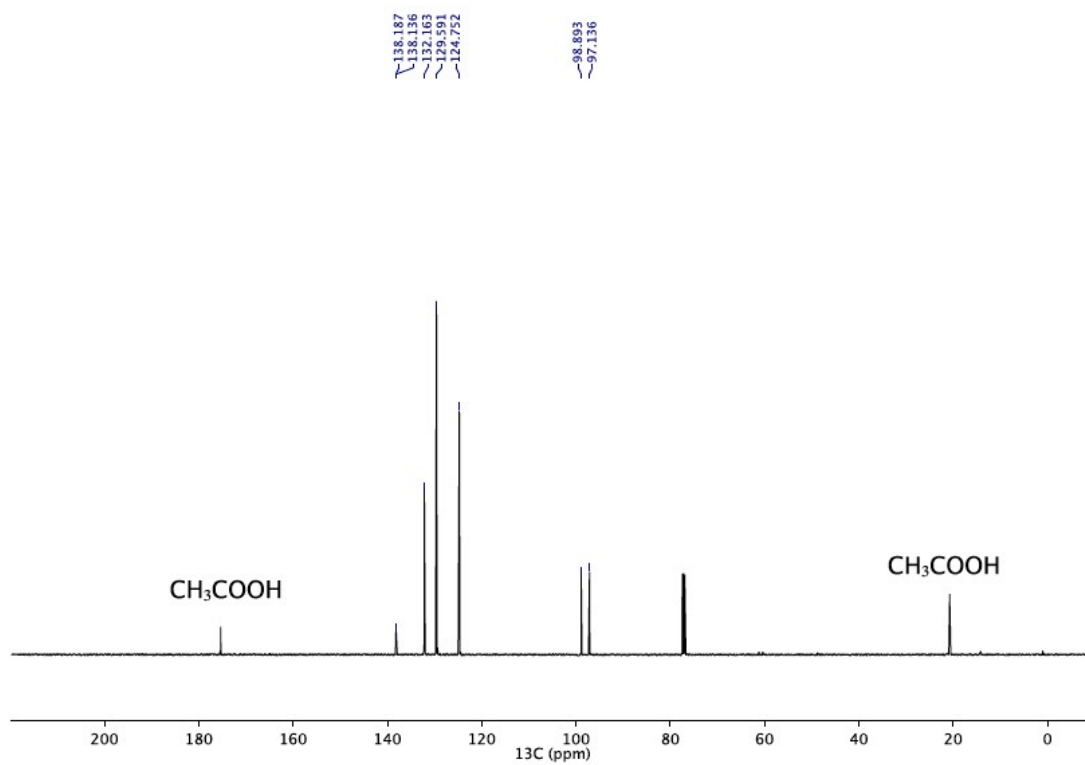

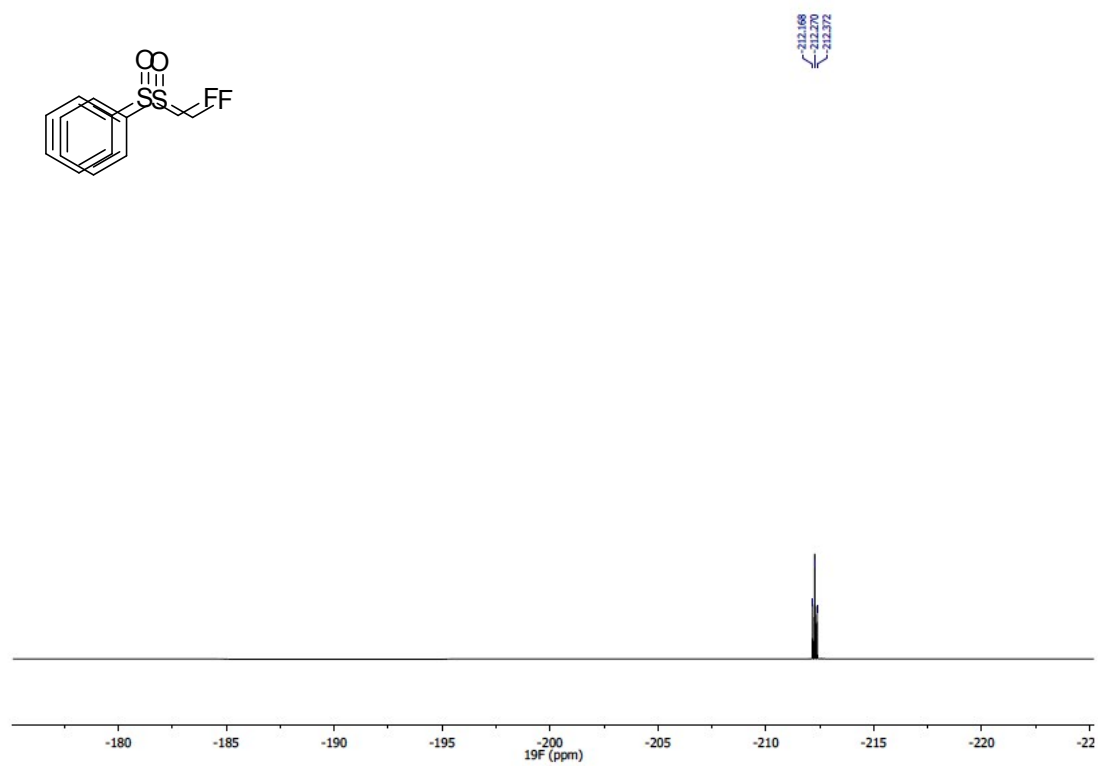

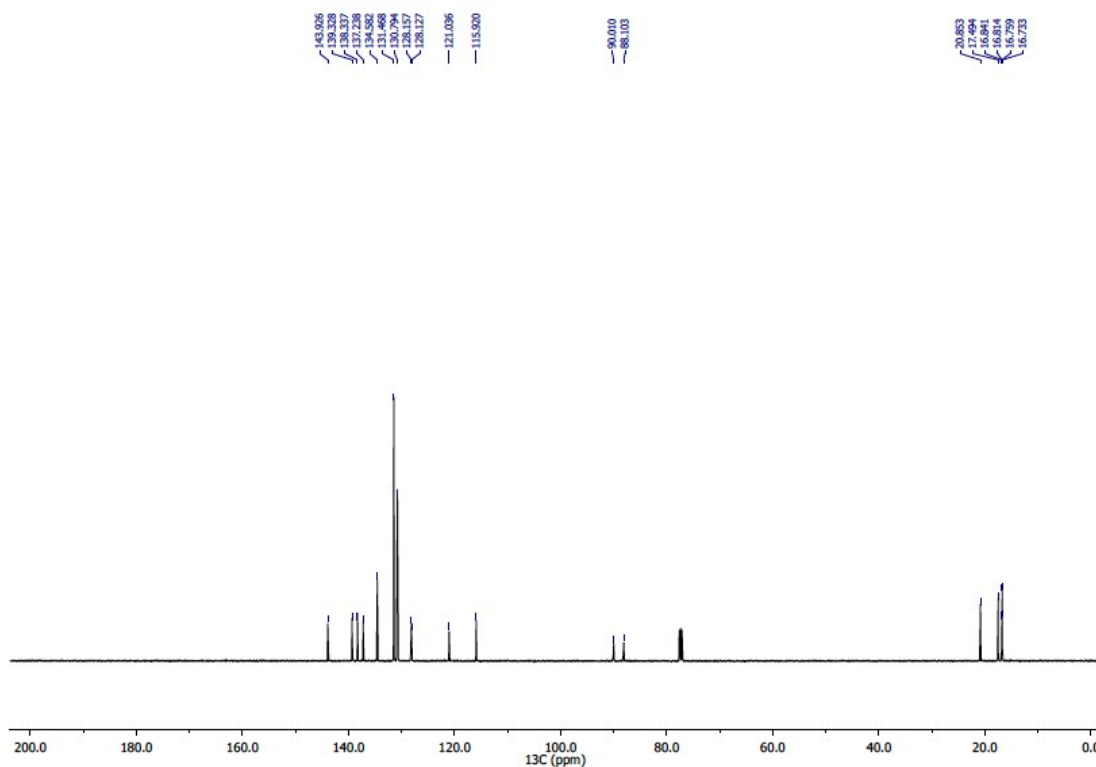

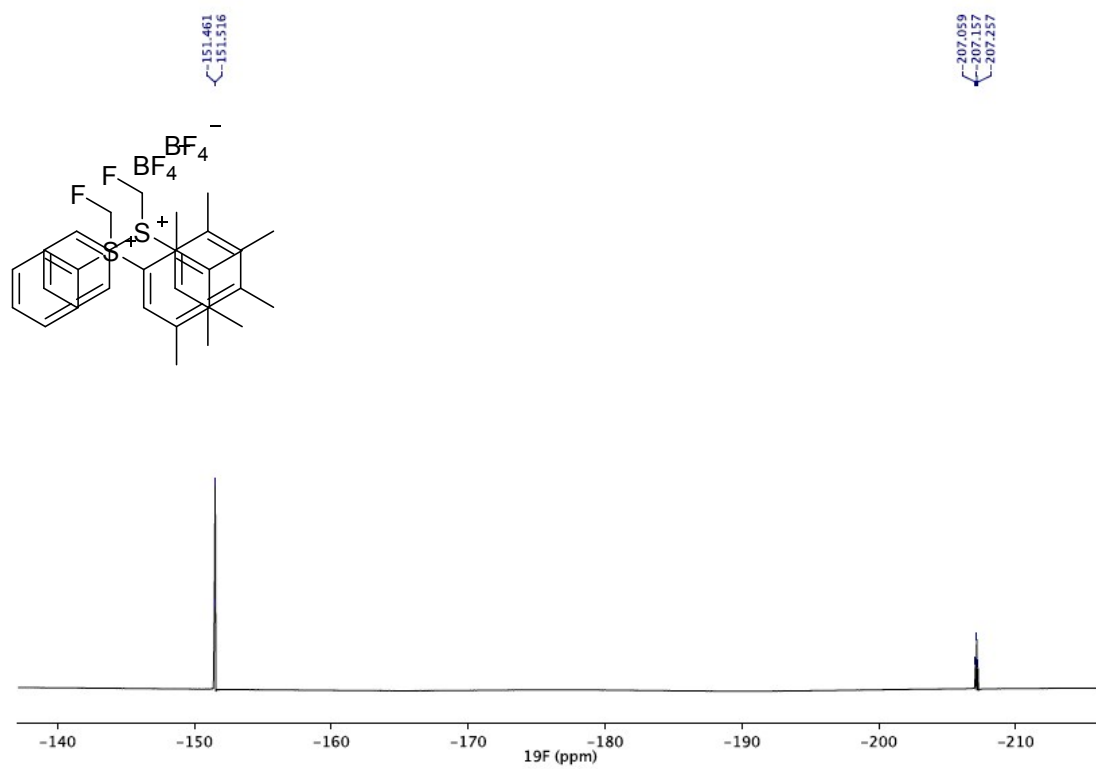

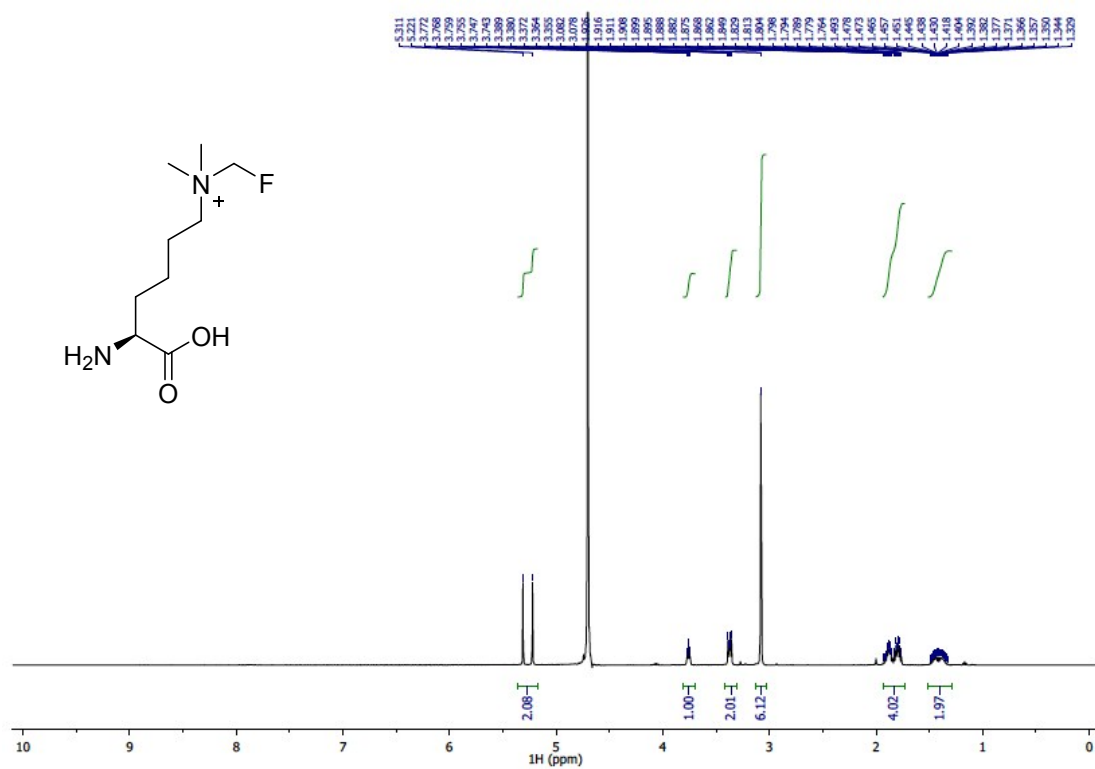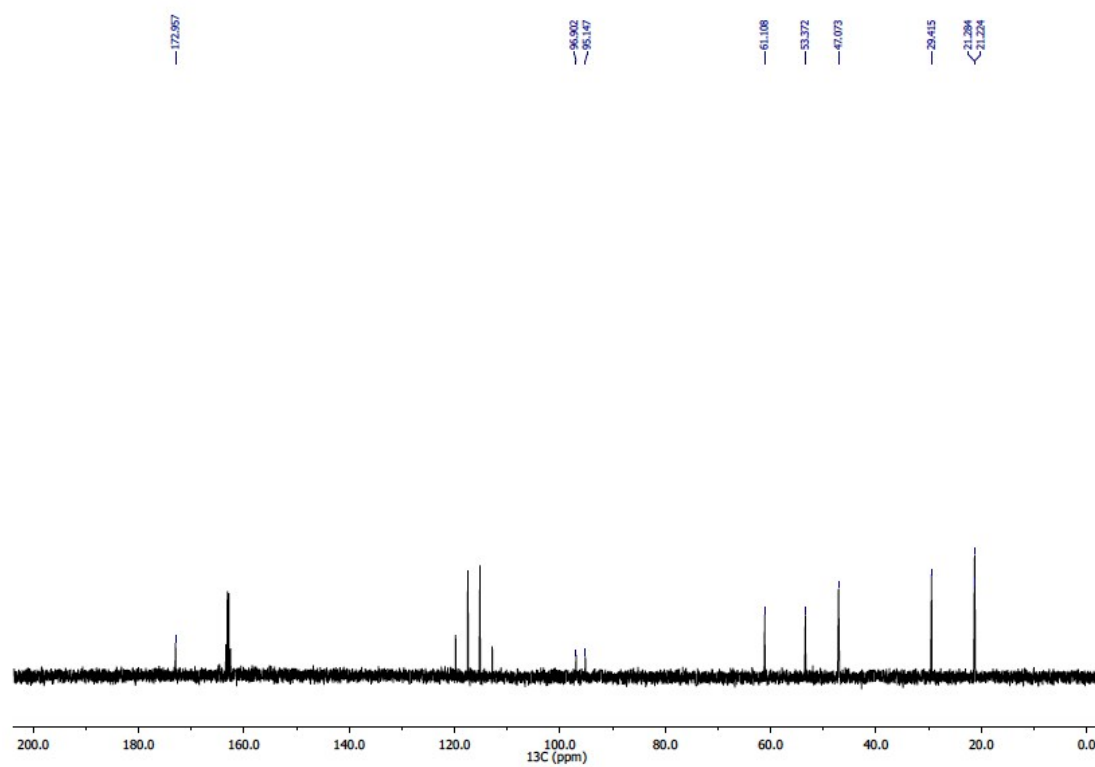

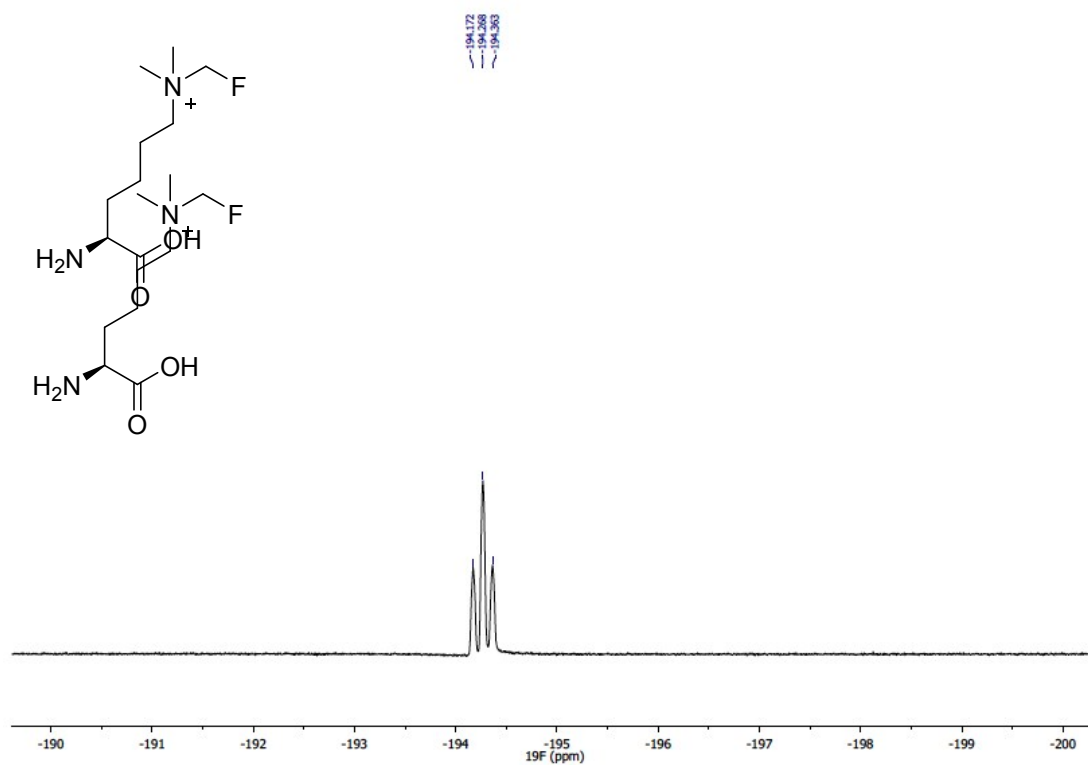

## 7. References

1. A. H. K.; Al Temimi, B. J. G. E. Pieters, Y. V. Reddy, P. B. White, J. Mecinović, *Chem. Commun.*, 2016, **52**, 12849-12852.
2. A. M. Rydzik, I. K. H. Leung, A. Thalhammer, G. T. Kochan, T. D. W. Claridge and C. J. Schofield, *Chem. Commun.*, 2014, **50**, 1175-1177.
